# Supplementary material for: Management of Low Birth Weight in Canine and Feline Species: Breeder Profiling
Source: MDPI journal article supplement (doi:10.3390/ani11102953), 2021-10-13
Supplement: s1 [file s1]

## Survey

| Question in the survey                                                                                                                                                                                                                                                                                                                                                                                                                                                                                                                                                                                                                                | % of missing answers | Variable used for the analysis                                                                                                                                |
|-------------------------------------------------------------------------------------------------------------------------------------------------------------------------------------------------------------------------------------------------------------------------------------------------------------------------------------------------------------------------------------------------------------------------------------------------------------------------------------------------------------------------------------------------------------------------------------------------------------------------------------------------------|----------------------|---------------------------------------------------------------------------------------------------------------------------------------------------------------|
| You are: dog breeder / cat breeder / both                                                                                                                                                                                                                                                                                                                                                                                                                                                                                                                                                                                                             | 0.1                  | Dog breeder / Cat breeder / Both                                                                                                                              |
| Do you know the average mortality rate between birth and sale in your facility? No / Yes, precisely / Yes, approximatively                                                                                                                                                                                                                                                                                                                                                                                                                                                                                                                            | 0.1                  | Not used                                                                                                                                                      |
| Indicate your mortality rate between birth and sale (excluding stillbirths)                                                                                                                                                                                                                                                                                                                                                                                                                                                                                                                                                                           | 30                   | Not used                                                                                                                                                      |
| Which conditions most influence the risk of mortality between birth and 2 months of age?<br>16 possibilities: low birth weight; presence of a malformation; low body temperature; low weight gain during the first days of life; a sick puppy/kitten; a newborn staying away from its litter; a litter of large size; a very small litter size (1 or 2); difficult farrowing; low maternal milk production; exaggerated maternal behaviour; very poorly developed maternal behaviour; the presence of a sick mother; the presence of sick puppies/kittens in the same litter; feeding/surveying during the first days of life; other (to be precised) | 0.1                  | Low birth weight is a risk of mortality: Yes / No                                                                                                             |
| Which criteria do you use to define low puppy/kitten birth weight?<br>Weighing/BCS/Vitality/Size                                                                                                                                                                                                                                                                                                                                                                                                                                                                                                                                                      | 0                    | Method to identify low birth weight: Weighing versus observation                                                                                              |
| How do you manage low birth weight puppies/kittens in your facility?<br>10 possibilities: I do nothing special; I monitor their temperature; I euthanise them; I weigh them regularly; I warm them up (incubator, hot water bottle, etc.); I control or force them to suckle their mother; I artificially feed the smallest offspring; I take them to my veterinarian for treatment; I take them to my veterinarian for euthanasia.                                                                                                                                                                                                                   | 0                    | Binary variables: Artificial feeding (Yes/No) / Warming (Yes/No) / Controlled suckling (Yes/No) / Temperature monitoring (Yes/No) / Regular weighing (Yes/No) |

Legend: BCS: body condition score
